# Supplementary material
Source: PubMed Central journal article supplement (PMC4156724)
Supplement: 1323502111_pnas.201323502SI.pdf [file 1323502111_pnas.201323502SI.pdf]

# Supporting Information

Drexler et al. 10.1073/pnas.1323502111

## SI Methods

**Clinical Specimens.** Samples were collected at Pointe Noire hospitals with verbal informed consent from patients before the time of their death. All specimens ( $n = 24$ ) were received along with names and ages of patients at the Centre International de Recherches Médicales de Franceville (CIRMF), Franceville, Gabon, from October until November 2, 2010, i.e., 10 d before the first supplementary immunization activity in response to the outbreak (1). After initial investigation samples were transferred to the University of Bonn without further opening of sample containers. Control sera ( $n = 12$ ) were collected in neighboring Gabon between May and June 2011, several weeks after an oral polio vaccine (OPV) campaign in Gabon between January and April 2011. Additional control sera ( $n = 34$ ) were obtained from German medical students and from German outpatients ( $n = 17$ ) sent to the National Reference Center for Poliomyelitis and Enteroviruses (NRC PE) at the Robert Koch Institute for confirmation of anti-polio virus immunity.

**RT-PCR.** RNA was purified from all specimens using the Qiagen Viral RNA kit (Qiagen) and tested at CIRMF for enterovirus RNA by real time RT-PCR targeting the viral 5'-UTR (2). Confirmatory testing was done at the Institute of Virology, using the 5'-UTR real-time (2) and additional (hemi)nested RT-PCR assays targeting the viral 5'-UTR, VP2, and VP1 genomic regions (3–5). The full genome was determined by long-range PCR and Sanger sequencing. Genome termini were determined using a RACE strategy (Roche). Further PCR protocols are available upon request.

**Exclusion of Alternative Outbreak-Associated Etiologies.** Testing for viruses other than poliovirus type 1 (PV1) included PCR or RT-PCR for cytomegalovirus, human herpesvirus type 6, herpes simplex virus type 1 and 2, varicella-zoster virus, rotavirus serogroup A, norovirus genogroups 1 and 2, sapovirus, astrovirus, human parechovirus, and influenza viruses A and B. Broad-range RT-PCR was used for the genera *Enterovirus*, *Flavivirus*, *Alphavirus*, *Phlebovirus*, *Mastadenovirus*, *Alphacoronavirus*, and *Betacoronavirus* and the family *Paramyxoviridae* (2–20).

**Cell Culture.** Human rhabdomyosarcoma (RD) cells were used for virus isolation, according to World Health Organization (WHO) guidelines. Neutralization assays in RD, human epidermoid carcinoma 2 (HEp-2) Cincinatti, and Vero cells were done including an in-house reference serum calibrated against the International Standard Serum with known neutralizing activity in each test to control reproducibility of results (21). Calibrated reference anti-body sera against PV1-3 obtained from the National Institute for

Biological Standardization and Control (NIBSC) (Hertfordshire, UK; NIBSC code 82/585) were used additionally to control results. Briefly, heat-inactivated sera (30 min at 56 °C) were diluted two-fold (starting dilutions varied according to the available serum volumes for each laboratory; see Tables S2–S7) and incubated with 100 TCID<sub>50</sub> of challenge virus at 37 °C for 1–3 h. After adding RD, HEp-2C, or Vero cells, microtiter plates were incubated at 37 °C with 5% (vol/vol) CO<sub>2</sub> for 2 d (Vero cells) or 5 d (RD and HEp-2C cells). Virus-induced cytopathogenic effect (CPE) was evaluated by direct microscopy. Endpoint titers were defined as reciprocals of the highest serum dilutions inhibiting CPE in 50% of replicate wells. The titers of seed virus were redetermined from control wells receiving no neutralizing serum in each assay (back titration) in agreement with WHO protocols (22).

**Phylogenetic Analysis.** Because poliovirus 1 (PV1) fulfilled the necessary population genetic criteria of both the hosts (a connected population exchanging the virus) and the virus (one species comprising genetically closely related viruses that originate from a common ancestor), coalescent-based analysis was performed. Complete VP1 gene sequences were aligned with all wild PV1 (WPV1) sequences available in GenBank. Sequences with unknown isolation dates and reference sequences that were >98% identical to any other sequence were excluded from further analysis. Based on published data on WPV1 molecular clock analyses, only strains detected during the last 20 y were included, to avoid saturation of branches (23). This dataset was analyzed under an SRD06 substitution model optimized for coding sequences with a relaxed uncorrelated lognormal clock and constant population growth assumptions. Phylogenetic analysis was done with Bayesian evolutionary analysis by sampling trees (BEAST) 1.4.7 (24) using 50,000,000 generations sampled every 1,000 steps, resulting in 50,000 trees of which 25% were discarded as burn-in. Identical tree topology was yielded in confirmatory analyses with MrBayes Version 3.1 (25) using a GTR+G+I nucleotide substitution model and default chain and run parameters over 2,000,000 generations.

**Statistics.** All statistics were calculated using SPSS V22 (IBM).

**Ethics.** This study was part of an outbreak control operation coordinated by the Republic of Congo Ministry of Health and the WHO Central Africa Regional Office. The study was additionally approved by the CIRMF scientific review board. Sera from German vaccinees were obtained during poliovirus neutralization exercises during medical courses and from outpatients sent for PV routine diagnostics.

- Centers for Disease Control and Prevention (CDC) (2011) Poliomyelitis outbreak—Republic of the Congo, September 2010–February 2011. *MMWR Morb Mortal Wkly Rep* 60(10):312–313.
- Verstrepen WA, Kuhn S, Kockx MM, Van De Vyvere ME, Mertens AH (2001) Rapid detection of enterovirus RNA in cerebrospinal fluid specimens with a novel single-tube real-time reverse transcription-PCR assay. *J Clin Microbiol* 39(11):4093–4096.
- Nix WA, Oberste MS, Pallansch MA (2006) Sensitive, seminested PCR amplification of VP1 sequences for direct identification of all enterovirus serotypes from original clinical specimens. *J Clin Microbiol* 44(8):2698–2704.
- Nix WA, et al. (2004) Failure to detect enterovirus in the spinal cord of ALS patients using a sensitive RT-PCR method. *Neurology* 62(8):1372–1377.
- Nasri D, et al. (2007) Typing of human enterovirus by partial sequencing of VP2. *J Clin Microbiol* 45(8):2370–2379.
- Chu DK, Poon LL, Guan Y, Peiris JS (2008) Novel astroviruses in insectivorous bats. *J Virol* 82(18):9107–9114.
- Engelmann I, et al. (2008) Rapid quantitative PCR assays for the simultaneous detection of herpes simplex virus, varicella zoster virus, cytomegalovirus, Epstein-Barr virus, and human herpesvirus 6 DNA in blood and other clinical specimens. *J Med Virol* 80(3):467–477.
- Rose TM (2005) CODEHOP-mediated PCR - a powerful technique for the identification and characterization of viral genomes. *Viral J* 2:20.
- Logan C, O'Leary JJ, O'Sullivan N (2006) Real-time reverse transcription-PCR for detection of rotavirus and adenovirus as causative agents of acute viral gastroenteritis in children. *J Clin Microbiol* 44(9):3189–3195.
- Hoehne M, Schreier E (2006) Detection of Norovirus genogroup I and II by multiplex real-time RT-PCR using a 3'-minor groove binder-DNA probe. *BMC Infect Dis* 6:69.
- Bellau-Pujol S, et al. (2005) Development of three multiplex RT-PCR assays for the detection of 12 respiratory RNA viruses. *J Virol Methods* 126(1-2):53–63.
- Panning M, et al. (2011) Singleplex real-time RT-PCR for detection of influenza A virus and simultaneous differentiation of A/H1N1v and evaluation of the RealStar influenza kit. *J Clin Virol* 50(2):171–174.
- Moureaux G, et al. (2007) A real-time RT-PCR method for the universal detection and identification of flaviviruses. *Vector Borne Zoonotic Dis* 7(4):467–477.

14. Baumgarte S, et al. (2008) Prevalence, types, and RNA concentrations of human parechoviruses, including a sixth parechovirus type, in stool samples from patients with acute enteritis. *J Clin Microbiol* 46(1):242–248.
15. Grywna K, et al. (2010) Detection of all species of the genus Alphavirus by reverse transcription-PCR with diagnostic sensitivity. *J Clin Microbiol* 48(9):3386–3387.
16. Allard A, Albinsson B, Wadell G (2001) Rapid typing of human adenoviruses by a general PCR combined with restriction endonuclease analysis. *J Clin Microbiol* 39(2): 498–505.
17. de Souza Luna LK, et al. (2007) Generic detection of coronaviruses and differentiation at the prototype strain level by reverse transcription-PCR and nonfluorescent low-density microarray. *J Clin Microbiol* 45(3):1049–1052.
18. da Silva Filho LV, et al. (2012) The differential clinical impact of human coronavirus species in children with cystic fibrosis. *J Infect Dis* 206(3):384–388.
19. Tong S, Chern SW, Li Y, Pallansch MA, Anderson LJ (2008) Sensitive and broadly reactive reverse transcription-PCR assays to detect novel paramyxoviruses. *J Clin Microbiol* 46(8):2652–2658.
20. Sánchez-Seco MP, et al. (2003) Detection and identification of Toscana and other phleboviruses by RT-nested-PCR assays with degenerated primers. *J Med Virol* 71(1): 140–149.
21. Diedrich S, Claus H, Schreier E (2002) Immunity status against poliomyelitis in Germany: Determination of cut-off values in International Units. *BMC Infect Dis* 2:2.
22. World Health Organization (1997) *Manual for the virological investigation of poliomyelitis (WHO/EPI/GEN/97.01)* (World Health Organization, Geneva).
23. Jorba J, Campagnoli R, De L, Kew O (2008) Calibration of multiple poliovirus molecular clocks covering an extended evolutionary range. *J Virol* 82(9):4429–4440.
24. Drummond AJ, Rambaut A (2007) BEAST: Bayesian evolutionary analysis by sampling trees. *BMC Evol Biol* 7:214.
25. Ronquist F, Huelsenbeck JP (2003) MrBayes 3: Bayesian phylogenetic inference under mixed models. *Bioinformatics* 19(12):1572–1574.

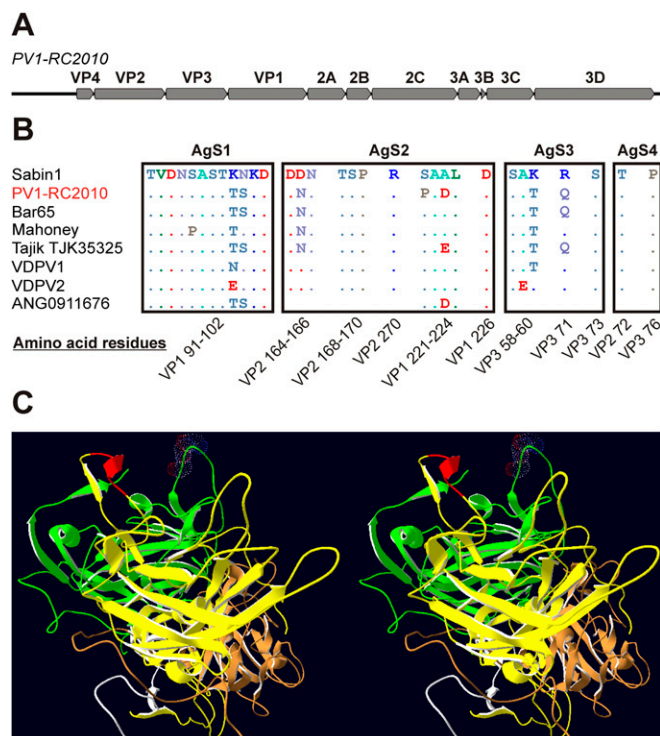

**Fig. S1.** Genome organization of PV1-RC2010, PV1 antigenic sites (AgS), and PV1 structural protein folding (stereo image). (A) Representation of the genome organization of PV1-RC2010 including 5'- and 3'-UTRs. (B) PV1 AgS1–4 annotated according to refs. 1 and 2 with amino acid residues indicated below. GenBank accession numbers, where applicable: CHAT, AJ416942; Sabin-1, V01150; Mahoney, V01149; VDPV1, AF462418; Bar65, AY278553; PV1-RC2010, JF838278; Tajik TJK35325, KC880372; and Angola 2009 VP1, JF313102. Amino acid identities with Sabin-1 are indicated by dots; deviations are spelled out. (C) The AgS2 domain 2a (VP1 residues 221–226) is highlighted as a red loop with a small alpha-helix part. The opposing domain 2b (VP2 residues 168–170) is shown as a loop surrounded by dots (van der Waals radii, shown for clarity of presentation only). All proteins are shown as C trace and ribbons without side chains; therefore neither specifically depicts PV1 Sabin nor PV1-RC2010 strains.

1. Minor PD (1990) Antigenic structure of picornaviruses. *Curr Top Microbiol Immunol* 161:121–154.
2. Yakovenko ML, et al. (2006) Antigenic evolution of vaccine-derived polioviruses: changes in individual epitopes and relative stability of the overall immunological properties. *J Virol* 80(6):2641–2653.

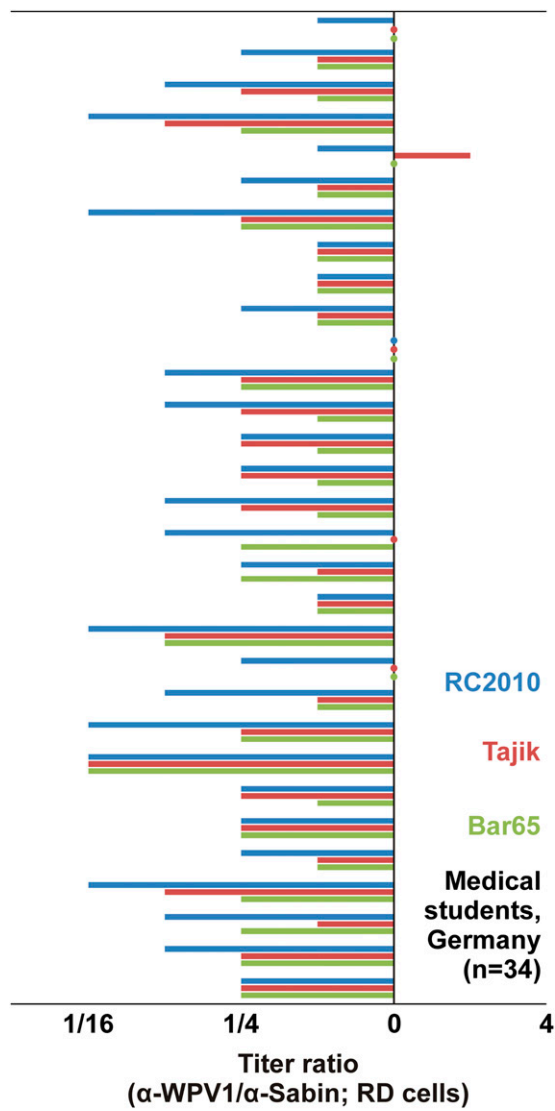

**Fig. S2.** Deviations between serum neutralization of WPV1 strains *PV1-RC2010*, Bar65, and Tajik compared with Sabin-1. Relative reciprocal neutralization titers determined on RD cells against each WPV1 divided by those against Sabin-1 (“ $\alpha$ -Sabin”). Bars pointing left indicate an excess of antibodies against Sabin-1 and vice versa. Null deviations are indicated by circles color-coded by each WPV1.

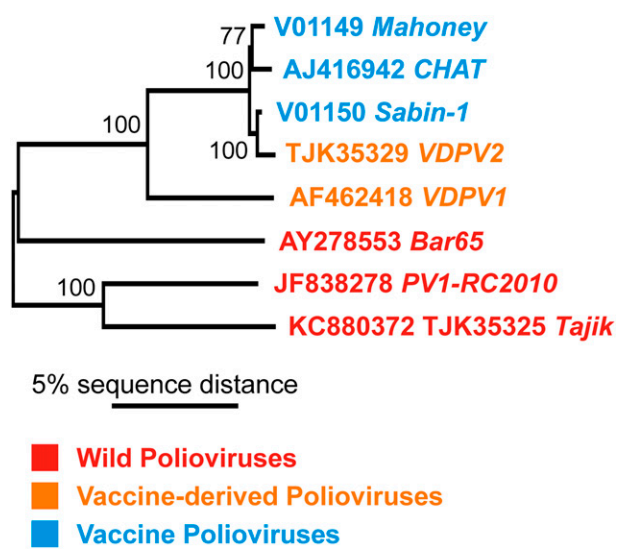

**Fig. S3.** Phylogenetic relationships between PV1 used for comparative neutralization tests. The neighbor-joining phylogeny was calculated using Molecular Evolutionary Genetics Analysis Version 5 (1) with a percentage nucleotide distance substitution model and a complete deletion option. Full genomes were used for all viruses identified by strain names and GenBank accession numbers, where applicable. Values at nodes indicate statistical support from 1,000 bootstrap replicates.

1. Tamura K, et al. (2011) MEGA5: Molecular evolutionary genetics analysis using maximum likelihood, evolutionary distance, and maximum parsimony methods. *Mol Biol Evol* 28(10): 2731–9.

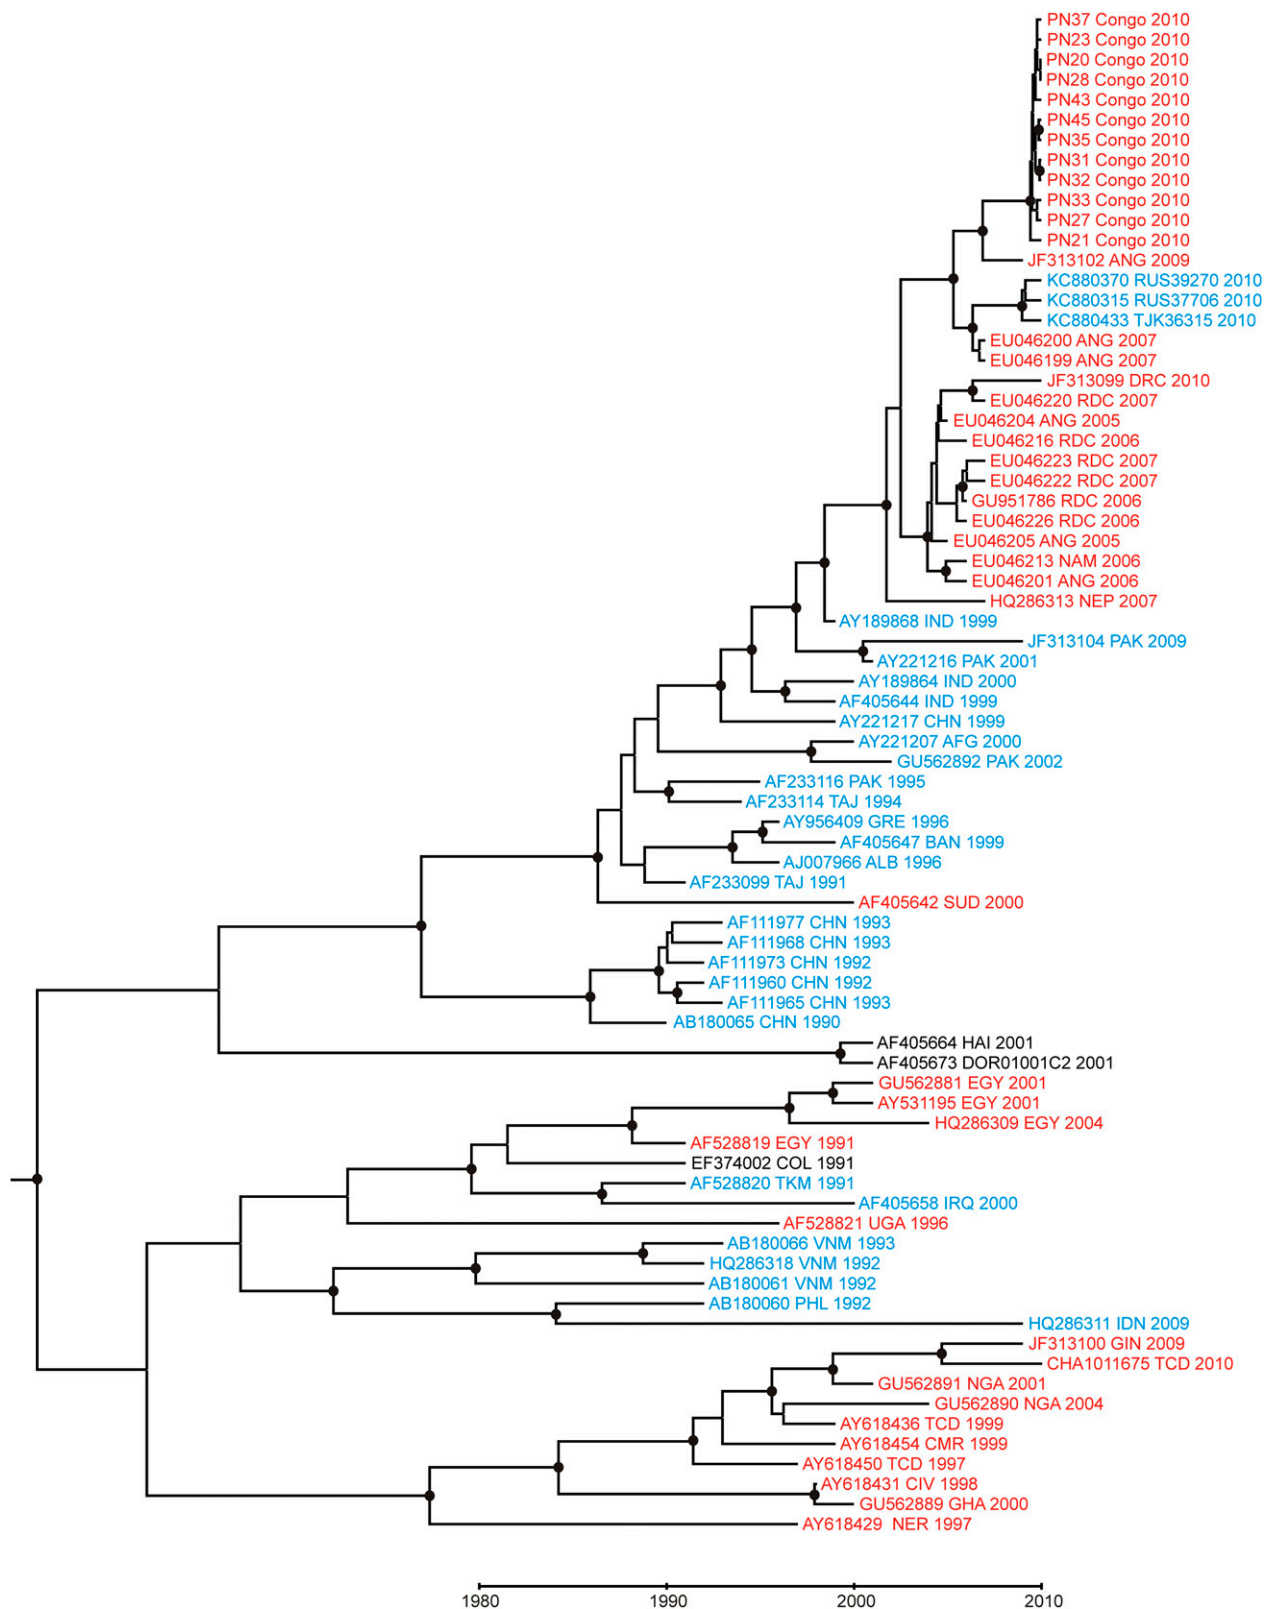

**Fig. 54.** WPV1 complete VP1 gene phylogeny including the RC2010 viruses and PV1 reference strains. The phylogenetic reconstruction was created with BEAST Version 1.4.7 (1) for the complete VP1 genome region of 76 PV1 strains isolated from 1990 to 2010. (Scale bar: 1980–2010; indicates evolutionary timing in years.) Filled circles at tree nodes indicate posterior probabilities above 0.95. African viruses are in red, Asian in blue, and others in black. Viruses from the RC2010 outbreak are given with patient codes.

1. Drummond AJ, Rambaut A (2007) BEAST: Bayesian evolutionary analysis by sampling trees. *BMC Evol Biol* 7:214.

**Table S1. Results in laboratory-confirmed fatal poliomyelitis cases**

| Patient |        | RT-PCR      |              |                     | Virus characterization             |
|---------|--------|-------------|--------------|---------------------|------------------------------------|
| Code    | Age, y | Throat swab | Rectal swab* | Cerebrospinal fluid |                                    |
| PN20    | 21     | –           | +            | N/A                 | VP1                                |
| PN21    | 14     | +           | +            | –                   | VP1                                |
| PN23    | 18     | +           | +            | N/A                 | VP1                                |
| PN27    | 12     | –           | +            | N/A                 | VP1                                |
| PN28    | 23     | –           | +            | N/A                 | VP1                                |
| PN30    | 18     | N/A         | –            | +                   | —                                  |
| PN31    | 22     | –           | +            | –                   | VP1                                |
| PN32    | 18     | N/A         | +            | N/A                 | VP1                                |
| PN33    | 20     | +           | +            | N/A                 | VP1                                |
| PN35    | 20     | –           | +            | N/A                 | VP1                                |
| PN37    | 24     | +           | +            | –                   | VP1                                |
| PN43    | 20     | N/A         | +            | N/A                 | VP1                                |
| PN45    | 20     | N/A         | +            | N/A                 | Full genome,<br>isolate PV1 RC2010 |

N/A, not available; —, negative.

\*Second rectal swab samples for further laboratory confirmation could not be confirmed for the reason of death.

Table S2. Neutralizing antibody titers: Laboratory-confirmed poliomyelitis cases

| Patient | Neutralization titer                    |                     |                                       |             |                                         |            | Virus characterization             |
|---------|-----------------------------------------|---------------------|---------------------------------------|-------------|-----------------------------------------|------------|------------------------------------|
|         | Reciprocal, laboratory 1,<br>Vero cells | PV1, PV2, PV3 Sabin | Reciprocal, laboratory 2,<br>RD cells | PV1 Mahoney | Reciprocal, laboratory 1,<br>Vero cells | PV1 RC2010 |                                    |
| PN20    | 5, 80, 160                              |                     | 320, 160, 40                          | 20          | 10                                      | 80         | VP1                                |
| PN21    | 640, 640, 80                            |                     | 160, 1,280, 320                       | N/A*        | 640                                     | 40         | VP1                                |
| PN23    | 2,560, 640, 80                          |                     | 160, 2,560, N/A*                      | N/A*        | 160                                     | 80         | VP1                                |
| PN27    | 320, 320, 160                           |                     | 5,120, 640, 160                       | 320         | 5,120                                   | 320        | VP1                                |
| PN28    | 640, 640, 160                           |                     | 1,280, 640, 320                       | 640         | 1,280                                   | 640        | VP1                                |
| PN30    | 5,120, 1,280, 80                        |                     | 160, 40, N/A*                         | N/A*        | 640                                     | 80         | —                                  |
| PN31    | 160, 640, 80                            |                     | 2,560, 2,560, 320                     | N/A*        | 2,560                                   | 320        | VP1                                |
| PN32    | 80, 320, 20                             |                     | N/A*                                  | N/A*        | 80                                      | 40         | VP1                                |
| PN33    | 1,280, 640, 160                         |                     | N/A*                                  | 80          | 160                                     | 80         | VP1                                |
| PN35    | 160, 10, 10                             |                     | 2,560, 320, 320                       | N/A*        | 80                                      | 10         | VP1                                |
| PN37    | 640, 320, <5*                           |                     | N/A*                                  | 640         | 640                                     | 160        | VP1                                |
| PN43    | 320, 320, 160                           |                     | 2,560, 640, 1,280                     | 160         | 5,120                                   | 160        | VP1                                |
| PN45    | 80, 640, 640                            |                     | 640, 640, 320                         | 320         | 80                                      | 320        | Full genome, isolate<br>PV1 RC2010 |

\*These titers could not be finally determined due to exhaustion of serum samples.



**Table S3. Neutralizing antibody titers: Epidemiologically linked poliomyelitis cases without laboratory confirmation**

| Patient | Code | Age, y | Neutralization titer                 |                                    |                                      |                                                        |
|---------|------|--------|--------------------------------------|------------------------------------|--------------------------------------|--------------------------------------------------------|
|         |      |        | Reciprocal, laboratory 1, Vero cells | Reciprocal, laboratory 2, RD cells | Reciprocal, laboratory 1, Vero cells | PV1 Sabin; repeated testing for comparison with RC2010 |
|         |      |        | PV1, PV2, PV3 Sabin                  | PV1 Mahoney                        |                                      |                                                        |
| PK      | 23   |        | 80, 640, 160                         | N/A*                               | 80                                   | 40                                                     |
| PN6     | 19   |        | 2,560, 1,280, 10                     | N/A*                               | 1,920                                | 240                                                    |
| PN8     | 26   |        | 5, N/A*, N/A*                        | 10                                 | 10                                   | 80                                                     |
| PN9     | 21   |        | 1,280, 320, 80                       | 1,280                              | 1,280                                | 320                                                    |
| PN10    | 17   |        | 160, 20, N/A*                        | 160                                | 160                                  | 80                                                     |
| PN11    | 11   |        | 640, 320, 320                        | N/A*                               | 640                                  | 160                                                    |
| PN12    | 13   |        | 320, 160, 10                         | 2,560                              | 320                                  | 160                                                    |
| PN17    | 26   |        | 320, 2,560, 160                      | 640                                | 640                                  | 2,560                                                  |
| PN18    | 21   |        | 160, 2,560, N/A*                     | 160                                | 160                                  | 80                                                     |
| PN19    | 17   |        | 640, 640, 320                        | 2,560                              | 1,280                                | 640                                                    |
| PN41    | 22   |        | 640, 640, 80                         | N/A*                               | 640                                  | 160                                                    |

\*These titers could not be finally determined due to exhaustion of serum samples.

**Table S4. Neutralizing antibody titers: African healthy controls**

| Control | Code | Age, y | Neutralization titer                 |            |             |
|---------|------|--------|--------------------------------------|------------|-------------|
|         |      |        | Reciprocal, laboratory 1, Vero cells |            |             |
|         |      |        | PV1 Sabin                            | PV1 RC2010 | PV1 Mahoney |
| GO      | 3    |        | 80                                   | 20         | N/A*        |
| JCE     | 43   |        | 20                                   | 20         | 160         |
| GM      | 43   |        | 20                                   | <10*       | 80          |
| AO      | 56   |        | 80                                   | 40         | N/A*        |
| AE      | 48   |        | 320                                  | 80         | N/A*        |
| AN      | 29   |        | 10                                   | 10         | 20          |
| CM      | 46   |        | 160                                  | 160        | N/A*        |
| EM      | 29   |        | 10                                   | <10*       | N/A*        |
| CO      | 55   |        | 80                                   | 40         | N/A*        |
| MA      | N/A  |        | 40                                   | 10         | N/A*        |
| EE      | 40   |        | 40                                   | 40         | N/A*        |
| ME      | 38   |        | 160                                  | 80         | N/A*        |

\*These titers could not be finally determined due to exhaustion of serum samples.



**Table S5. Neutralizing antibody titers: German healthy controls (Medical students)**

| Controls | Age, y | Neutralization titer                    |            |             |                                       |            |                                         |            |
|----------|--------|-----------------------------------------|------------|-------------|---------------------------------------|------------|-----------------------------------------|------------|
|          |        | Reciprocal, laboratory 1,<br>Vero cells |            |             | Reciprocal, laboratory 2,<br>RD cells |            | Reciprocal, laboratory 2,<br>Hep2 cells |            |
|          |        | PV1 Sabin                               | PV1 RC2010 | PV1 Mahoney | PV1 Sabin                             | PV1 RC2010 | PV1 Sabin                               | PV1 RC2010 |
| 10/14246 | 26     | N/A                                     | N/A        | N/A         | 256                                   | 32         | 512                                     | 32         |
| 10/18599 | 27     | N/A                                     | N/A        | N/A         | 384                                   | 64         | 512                                     | 64         |
| 10/18620 | 23     | N/A                                     | N/A        | N/A         | >512                                  | 64         | >512                                    | 64         |
| 10/18627 | 25     | N/A                                     | N/A        | N/A         | >512                                  | 64         | >512                                    | 64         |
| 10/18628 | 21     | N/A                                     | N/A        | N/A         | 128                                   | 32         | 384                                     | 64         |
| 10/18629 | 27     | N/A                                     | N/A        | N/A         | 512                                   | 64         | 256                                     | 64         |
| 10/19066 | 25     | N/A                                     | N/A        | N/A         | >512                                  | 64         | >512                                    | 64         |
| 10/20787 | 24     | N/A                                     | N/A        | N/A         | 32                                    | <4*        | 48                                      | <4*        |
| 10/19071 | 22     | 80                                      | 20         | 80          | 192                                   | 32         | 128                                     | 96         |
| 10/20787 | 24     | 20                                      | <5*        | 5           | 32                                    | <4*        | 48                                      | <4*        |
| 11/14082 | 22     | 20                                      | 10         | N/A*        | 192                                   | 64         | 128                                     | 128        |
| 11/19504 | 22     | 80                                      | 10         | 80          | 128                                   | 16         | 192                                     | 24         |
| 11/19694 | 21     | 80                                      | 10         | 80          | 256                                   | 24         | 256                                     | 96         |
| 11/19697 | 35     | 40                                      | 40         | N/A*        | 384                                   | 128        | 384                                     | 384        |
| 11/20102 | 24     | 80                                      | 80         | N/A*        | >512                                  | 384        | 512                                     | 512        |
| 11/20203 | 23     | 20                                      | <5*        | N/A*        | 256                                   | 12         | 128                                     | 48         |
| 11/20204 | 22     | 5                                       | 5          | N/A*        | 192                                   | 8          | 192                                     | 64         |
| 11/20210 | 24     | 20                                      | <5*        | N/A*        | 192                                   | 24         | 128                                     | 64         |
| 11/20238 | 22     | 80                                      | 20         | N/A*        | >512                                  | 128        | >512                                    | 512        |
| 11/20247 | 22     | 160                                     | 20         | N/A*        | >512                                  | 32         | >512                                    | 128        |
| 11/20249 | 25     | 20                                      | 5          | N/A*        | 256                                   | 48         | 384                                     | 64         |
| 11/20250 | 23     | 10                                      | 5          | N/A*        | 192                                   | 16         | 128                                     | 32         |
| 11/20253 | 22     | 40                                      | 5          | N/A*        | 192                                   | 32         | 128                                     | 48         |
| 11/20357 | 22     | >640                                    | 40         | N/A*        | >512                                  | 192        | >512                                    | 48         |
| 11/20359 | 23     | 80                                      | 20         | N/A*        | >512                                  | 96         | 384                                     | 96         |
| 11/20496 | 24     | 5                                       | <5*        | N/A*        | 96                                    | 8          | 64                                      | 16         |
| 11/20690 | 25     | 5                                       | <5*        | N/A*        | 64                                    | 16         | 48                                      | 48         |
| 11/20804 | 22     | 40                                      | 5          | N/A*        | 512                                   | 16         | 384                                     | 32         |
| 11/20920 | 23     | 20                                      | 5          | N/A*        | 384                                   | 48         | 256                                     | 64         |
| 11/20934 | 23     | 20                                      | 5          | N/A*        | 256                                   | 24         | 256                                     | 64         |
| 11/21026 | 28     | 20                                      | 10         | N/A*        | 192                                   | 16         | 256                                     | 64         |
| AFT      | 35     | 10                                      | <5*        | N/A*        | 32                                    | <4*        | 32                                      | <4*        |
| RMZ      | 27     | 10                                      | <5*        | N/A*        | 16                                    | <4*        | 32                                      | <4*        |
| SB       | 30     | 20                                      | <5*        | N/A*        | 128                                   | <4*        | 96                                      | <4*        |

N/A, not available.

\*These titers could not be finally determined due to exhaustion of serum samples.

**Table S6. Neutralizing antibody titers: German outpatients**

| Control |        | Neutralization titer                 |            |
|---------|--------|--------------------------------------|------------|
|         |        | Reciprocal, laboratory 2, Hep2 cells |            |
| Code    | Age, y | PV1 Sabin                            | PV1 RC2010 |
| 13-46   | 55     | 16                                   | <4*        |
| 13-53   | 35     | 384                                  | 64         |
| 13-77   | 57     | 12                                   | <4*        |
| 13-105  | 17     | 512                                  | 192        |
| 13-116  | 11     | 128                                  | 96         |
| 13-124  | 8      | 96                                   | 24         |
| 13-125  | 55     | 512                                  | 8          |
| 13-126  | 13     | 256                                  | 256        |
| 13-127  | 24     | 48                                   | 8          |
| 13-136  | 26     | 96                                   | 96         |
| 13-137  | 64     | 16                                   | <4*        |
| 12-645  | 21     | 96                                   | 16         |
| 12-759  | N/A    | 24                                   | 4          |
| 12-760  | N/A    | 48                                   | 16         |
| 12-834  | 21     | 32                                   | 4          |
| 12-838  | 15     | 64                                   | 8          |
| 12-848  | 19     | 128                                  | 128        |

N/A, not available.

\*These titers could not be finally determined due to exhaustion of serum samples.

**Table S7. Neutralizing antibody titers: German healthy controls (Medical students)**

| Control  | Neutralization titer |            |                                    |                  |                             |                         |                         |
|----------|----------------------|------------|------------------------------------|------------------|-----------------------------|-------------------------|-------------------------|
|          | Code                 | Age, y     | Reciprocal, laboratory 3, RD cells |                  |                             |                         |                         |
|          |                      | PV1 Sabin* | PV1 RC2010                         | PV1 Bar65        | PV1 Tajik<br>(strain 35325) | VDPV1<br>(strain 11262) | VDPV2<br>(strain 35329) |
| 10/14246 | 26                   | 80         | 40                                 | 80               | 80                          | 160                     | 160                     |
| 10/18599 | 27                   | 160        | 40                                 | 80               | 80                          | 160                     | 160                     |
| 10/18620 | 23                   | 320        | 40                                 | 160              | 80                          | 320                     | 320                     |
| 10/18627 | 25                   | 640        | 40                                 | 160              | 80                          | 320                     | 320                     |
| 10/18628 | 21                   | 40         | 20                                 | 40               | 80                          | 80                      | 80                      |
| 10/18629 | 27                   | 80         | 20                                 | 40               | 40                          | 160                     | 160                     |
| 10/19066 | 25                   | 640        | 40                                 | 160              | 160                         | 320                     | 320                     |
| 10/19710 | 22                   | 20         | 10                                 | 10               | 10                          | 20                      | 20                      |
| 10/20787 | 24                   | 20         | 10                                 | 10               | 10                          | 10                      | 10                      |
| 10/19071 | 22                   | 80         | 20                                 | 40               | 40                          | 80                      | 80                      |
| 11/14082 | 22                   | 40         | 40                                 | 40               | 40                          | 40                      | 80                      |
| 11/19507 | 22                   | 80         | <10 <sup>†</sup>                   | 20               | 20                          | 80                      | 40                      |
| 11/19694 | 21                   | 80         | <10 <sup>†</sup>                   | 40               | 20                          | 80                      | 80                      |
| 11/19697 | 35                   | 320        | 80                                 | 160              | 80                          | 320                     | 320                     |
| 11/20102 | 24                   | 320        | 80                                 | 160              | 80                          | 320                     | 320                     |
| 11/20203 | 23                   | 80         | <10 <sup>†</sup>                   | 40               | 20                          | 80                      | 40                      |
| 11/20204 | 22                   | 80         | <10 <sup>†</sup>                   | 20               | 80                          | 80                      | <10 <sup>†</sup>        |
| 11/20210 | 24                   | 80         | 20                                 | 20               | 40                          | 40                      | 40                      |
| 11/20238 | 22                   | 320        | 160                                | 160              | 160                         | 640                     | 320                     |
| 11/20247 | 22                   | 1,280      | 80                                 | 160              | 160                         | 640                     | 1,280                   |
| 11/20249 | 25                   | 80         | 20                                 | 80               | 80                          | 160                     | 80                      |
| 11/20250 | 23                   | 80         | <10 <sup>†</sup>                   | 40               | 40                          | 80                      | 80                      |
| 11/20253 | 22                   | 160        | <10 <sup>†</sup>                   | 40               | 40                          | 40                      | 80                      |
| 11/20357 | 22                   | 1,280      | 80                                 | 80               | 80                          | 640                     | 1,280                   |
| 11/20359 | 23                   | 320        | 80                                 | 160              | 80                          | 320                     | 320                     |
| 11/20496 | 24                   | 40         | <10 <sup>†</sup>                   | <10 <sup>†</sup> | 10                          | 20                      | 40                      |
| 11/20690 | 25                   | 40         | <10 <sup>†</sup>                   | 20               | 20                          | 40                      | 20                      |
| 11/20807 | 22                   | 160        | <10 <sup>†</sup>                   | 40               | 20                          | 160                     | 160                     |
| 11/20920 | 23                   | 320        | 40                                 | 80               | 160                         | 160                     | 160                     |
| 11/20934 | 23                   | 160        | 20                                 | 40               | 40                          | 80                      | 160                     |
| 11/21026 | 28                   | 160        | 40                                 | 40               | 40                          | 80                      | 80                      |

\*Back titration yielded a challenge dose of 300–500 tissue culture infectious dose<sub>50</sub> (TCID<sub>50</sub>) for Sabin-1; all other viruses were used at 100–150 TCID<sub>50</sub>.

<sup>†</sup>These titers could not be finally determined due to exhaustion of serum samples.

**Table S8. Results of PV1 neutralization assays using three mAbs against AgS2 epitopes located in the VP2 and VP1 proteins**

| mAb     | Virus strains and neutralization test results; duplicate assays |     |     |     |     |     |       |       |       |       |        |        |
|---------|-----------------------------------------------------------------|-----|-----|-----|-----|-----|-------|-------|-------|-------|--------|--------|
|         | Dilution, 1/x                                                   |     |     |     |     |     |       |       |       |       |        |        |
|         | 16                                                              | 32  | 64  | 128 | 256 | 512 | 1,024 | 2,048 | 4,096 | 8,192 | 16,384 | 32,768 |
|         | PV1 Mahoney*                                                    |     |     |     |     |     |       |       |       |       |        |        |
| 14D2E9  | 0/0                                                             | 0/0 | 0/0 | 0/0 | 0/0 | +/+ | +/+   | +/+   | +/+   | +/+   | +/+    | +/+    |
| 12(237) | 0/0                                                             | 0/0 | 0/0 | 0/0 | 0/0 | 0/0 | 0/0   | 0/0   | +/+   | +/+   | +/+    | +/+    |
| 14(427) | 0/0                                                             | 0/0 | 0/0 | 0/0 | +/+ | +/+ | +/+   | +/+   | +/+   | +/+   | +/+    | +/+    |
|         | Escape mutant 1083; site 2a mutant, VP1 S221L <sup>†</sup>      |     |     |     |     |     |       |       |       |       |        |        |
| 14D2E9  | +/+                                                             | +/+ | +/+ | +/+ | +/+ | +/+ | +/+   | +/+   | +/+   | +/+   | +/+    | +/+    |
| 12(237) | +/+                                                             | +/+ | +/+ | +/+ | +/+ | +/+ | +/+   | +/+   | +/+   | +/+   | +/+    | +/+    |
| 14(427) | 0/0                                                             | 0/0 | 0/0 | 0/0 | 0/0 | 0/0 | 0/0   | 0/0   | 0/0   | 0/0   | +/0    | +/+    |
|         | Escape mutant 1005; site 2b mutant, VP2 P170S <sup>‡</sup>      |     |     |     |     |     |       |       |       |       |        |        |
| 14D2E9  | 0/0                                                             | 0/0 | 0/0 | 0/0 | 0/0 | 0/0 | 0/0   | +/0   | +/+   | +/+   | +/+    | +/+    |
| 12(237) | +/+                                                             | +/+ | +/+ | +/+ | +/+ | +/+ | +/+   | +/+   | +/+   | +/+   | +/+    | +/+    |
| 14(427) | 0                                                               | 0   | 0   | 0   | +/+ | +/+ | +/+   | +/+   | +/+   | +/+   | +/+    | +/+    |
|         | PV1-RC2010 outbreak strain                                      |     |     |     |     |     |       |       |       |       |        |        |
| 14D2E9  | +/+                                                             | +/+ | +/+ | +/+ | +/+ | +/+ | +/+   | +/+   | +/+   | +/+   | +/+    | +/+    |
| 12(237) | +/+                                                             | +/+ | +/+ | +/+ | +/+ | +/+ | +/+   | +/+   | +/+   | +/+   | +/+    | +/+    |
| 14(427) | +/+                                                             | +/+ | +/+ | +/+ | +/+ | +/+ | +/+   | +/+   | +/+   | +/+   | +/+    | +/+    |

0, no CPE and neutralization of infectivity; +, CPE and no neutralization.

\*mAb 14D2E9 binds specifically in site 2a (1) and has been found to correlate well with neutralizing antibody titers against PV1 (2); 237 is a mAb eliciting a VP2 P170S exchange (escape mutant 1005) as published in ref. 3; 427 binds a composite epitope in AgS2.

<sup>†</sup>PV1 mutants generated by culture under antibody pressure, as published in ref. 3. Mutant 1083 (designated as "9" in ref. 3) has a mutation in AgS2a, VP1 residue 221 (S→L). Mutant 1005 (designated as "7" in ref. 3) has a mutation in AgS2b, VP2 residue 170 (P→S).

- Osterhaus AD, et al. (1983) Monoclonal antibodies to polioviruses. Comparison of intratypic strain differentiation of poliovirus type 1 using monoclonal antibodies versus cross-absorbed antisera. *Intervirology* 20(2-3):129-136.
- Herremans MM, et al. (1997) Evaluation of a poliovirus-binding inhibition assay as an alternative to the virus neutralization test. *Clin Diagn Lab Immunol* 4(6):659-664.
- Minor PD, Ferguson M, Evans DM, Almond JW, Icenogle JP (1986) Antigenic structure of polioviruses of serotypes 1, 2 and 3. *J Gen Virol* 67(Pt 7):1283-1291.
